# Supplementary material for: Potential Antioxidant and Angiotensin I-converting Enzyme Inhibitory Activity in Crust of Dry-aged Beef
Source: PubMed Central journal article supplement (PMC7217845; doi:10.1038/s41598-020-64861-0), 2020-05-12
Supplement: 41598_2020_64861_MOESM1_ESM.pdf [file 41598_2020_64861_MOESM1_ESM.pdf]

# Potential Antioxidant and Angiotensin I-converting Enzyme Inhibitory Activity in Crust of Dry-aged Beef

Juhui Choe<sup>1</sup>, Bumjin Park<sup>1</sup>, Hyun Jung Lee<sup>1</sup>, Cheorun Jo<sup>1,2,\*</sup>

<sup>1</sup> Department of Agricultural Biotechnology, Center for Food and Bioconvergence, and  
Research Institute of Agriculture and Life Science, Seoul National University, Seoul 08826,  
Korea

<sup>2</sup>Institute of Green Bio Science and Technology, Seoul National University, Pyeongchang  
25354, Korea

**\*Correspondence:** Cheorun Jo, Department of Agricultural Biotechnology, Seoul National  
University, Seoul 08826, Republic of Korea.

Tel.: +82-2-880-4804; Fax: +82-2-873-2271; E-mail: [cheorun@snu.ac.kr](mailto:cheorun@snu.ac.kr)

Table S1. Small peptides (3 kDa) identified by LC/MS/MS from un-aged, wet-aged, dry-aged, and the crust of beef sirloins

| Protein name                                                                         | No. | Peptide sequence   | Observed MW (Da) | Aging method/portion |           |           |       |
|--------------------------------------------------------------------------------------|-----|--------------------|------------------|----------------------|-----------|-----------|-------|
|                                                                                      |     |                    |                  | Non-aged (Fresh)     | Wet aging | Dry aging | Crust |
| Actin, alpha cardiac muscle 1                                                        | 1   | AGFAGDDAPR         | 975.44           |                      |           |           | +     |
|                                                                                      | 2   | AVFPSIVGR          | 944.55           |                      |           |           | +     |
|                                                                                      | 3   | DNGSGLVKAGFAGDDAPR | 1745.84          |                      |           |           | +     |
|                                                                                      | 4   | FPSIVGR            | 774.44           |                      |           |           | +     |
| Actin, alpha skeletal muscle                                                         | 5   | DEDETT             | 750.25           |                      |           | +         |       |
|                                                                                      | 6   | ITKQEYDEAGPSIVHRK  | 1970.04          |                      | +         | +         |       |
|                                                                                      | 7   | TKQEYDEAGPSIVHRK   | 1856.94          |                      | +         |           |       |
| Alpha-1,4 glucan phosphorylase                                                       | 8   | MPAPDEKI           | 899.44           |                      |           |           | +     |
|                                                                                      | 9   | SRPLTDQEKRKQISVRG  | 2039.13          |                      |           | +         |       |
| AP complex subunit beta                                                              | 10  | LGDLLNLDLGGPPVSG   | 1478.88          |                      |           | +         |       |
|                                                                                      | 11  | TVEISLP            | 757.39           |                      |           | +         |       |
| AP-5 complex subunit beta-1                                                          | 12  | LNPASGASGRLLPLL*   | 1478.89          |                      |           | +         |       |
|                                                                                      | 13  | LPLAGD             | 584.35           |                      |           | +         |       |
| Arf-GAP with SH3 domain, ANK repeat and PH domain-containing protein 1 ATF6B protein | 14  | DPPSPLP            | 721.44           |                      | +         |           |       |
|                                                                                      | 15  | LGDDPTSP           | 800.40           |                      | +         |           |       |
| Beta-catenin-like protein 1 BTB/POZ domain-containing protein KCTD15                 | 16  | SIAVVDL            | 715.39           |                      |           | +         |       |
| Carbonic anhydrase                                                                   | 17  | RSPVSPL            | 754.42           |                      |           | +         |       |
|                                                                                      | 18  | IVKASFK            | 791.49           |                      |           |           | +     |
| Carbonic anhydrase 3                                                                 | 19  | NWRPPQPIKGR        | 1348.74          |                      |           |           | +     |
| Cardiac phospholamban                                                                | 20  | MDKVQYLTR          | 1194.61          |                      |           |           | +     |
| Cbp/p300-interacting transactivator 1                                                | 21  | LPELWL*            | 769.44           |                      |           |           | +     |
| Coagulation factor V                                                                 | 22  | EVDIMKVH           | 1026.57          |                      |           |           | +     |
| Creatine kinase M-type                                                               | 23  | DDVIQTG            | 746.35           |                      |           | +         |       |
|                                                                                      | 24  | DEESYTVFKD         | 1231.53          |                      | +         | +         |       |
|                                                                                      | 25  | DKPVSPL            | 754.42           |                      | +         | +         |       |
|                                                                                      | 26  | DPIIQDR            | 855.45           |                      |           |           | +     |
|                                                                                      | 27  | FKAEEEYPDLSKHNNH   | 1956.91          |                      |           |           | +     |
|                                                                                      | 28  | GVDNPGHPF          | 938.43           |                      |           |           | +     |
|                                                                                      | 29  | IDDHFL             | 758.36           |                      |           |           | +     |
|                                                                                      | 30  | PFGNTHNK           | 913.45           |                      |           |           | +     |
|                                                                                      | 31  | SIDDMIPAQK         | 1116.55          |                      |           |           | +     |

|                                                           |    |                              |         |   |  |   |   |
|-----------------------------------------------------------|----|------------------------------|---------|---|--|---|---|
|                                                           | 32 | TLEIYKK                      | 893.53  |   |  |   | + |
|                                                           | 33 | VVDGVKL*                     | 728.44  |   |  |   | + |
| CTF18, chromosome transmission fidelity factor 18 homolog | 34 | PTLDITPP                     | 852.49  | + |  |   |   |
| Diacylglycerol kinase                                     | 35 | IPVP                         | 424.27  | + |  |   |   |
|                                                           | 36 | PAPEPAPVP                    | 873.46  | + |  |   |   |
| DKK3 protein                                              | 37 | PVCTPLPVEG                   | 1026.56 |   |  | + |   |
| Elastin                                                   | 38 | AKLGAGGAGVLP*                | 1009.63 |   |  | + |   |
|                                                           | 39 | AVGIGGIP*                    | 682.44  | + |  | + | + |
|                                                           | 40 | VGIGGIP*                     | 611.40  | + |  |   |   |
|                                                           | 41 | VGVGG                        | 387.21  |   |  |   | + |
|                                                           | 42 | VIGAGVP*                     | 611.40  |   |  | + |   |
| Fructose-bisphosphate aldolase                            | 43 | ESLFISNH                     | 946.44  |   |  |   | + |
|                                                           | 44 | ESLFISNHAY                   | 1179.56 |   |  |   | + |
| Glyceraldehyde-3-phosphate dehydrogenase (GAPDH)          | 45 | AVGKVIP*                     | 682.44  | + |  | + |   |
|                                                           | 46 | AVGKVIPE                     | 811.48  |   |  |   | + |
|                                                           | 47 | AVGKVIPELN                   | 1038.61 |   |  |   | + |
|                                                           | 48 | AVGKVIPELNGK                 | 1223.73 |   |  |   | + |
|                                                           | 49 | AVGKVIPELNGKLT               | 1437.86 | + |  | + |   |
|                                                           | 50 | AVGKVIPELNGKLTG              | 1494.88 | + |  |   |   |
|                                                           | 51 | DAGAGIALNDH                  | 1052.48 | + |  |   |   |
|                                                           | 52 | DAGAGIALNDHFVK               | 1426.73 | + |  | + |   |
|                                                           | 53 | DFNSDTH                      | 834.31  | + |  | + |   |
|                                                           | 54 | DNEFGYSNR                    | 1100.45 | + |  | + |   |
|                                                           | 55 | DPANIKW                      | 842.43  |   |  | + |   |
|                                                           | 56 | EKPAKYDEIKKVVVKQASE<br>GPLK  | 2484.40 | + |  |   |   |
|                                                           | 57 | ELNGKLT                      | 773.43  |   |  | + |   |
|                                                           | 58 | FDAGAGIALNDHFVK              | 1573.79 | + |  | + |   |
|                                                           | 59 | GAAKAVGKVIP                  | 1009.63 |   |  | + |   |
|                                                           | 60 | GFRIGR                       | 761.43  |   |  |   | + |
|                                                           | 61 | GIALNDH                      | 738.37  | + |  | + |   |
|                                                           | 62 | GIALNDHFVK                   | 1112.60 | + |  | + |   |
|                                                           | 63 | IALNDHFVK                    | 1055.58 | + |  |   |   |
|                                                           | 64 | IIPASTGAAKAVGKVIP            | 1591.97 |   |  | + |   |
|                                                           | 65 | IPASTGAAKAVGKVIP             | 1478.89 |   |  | + |   |
|                                                           | 66 | IPASTGAAKAVGKVIPELN          | 1835.05 | + |  | + |   |
|                                                           | 67 | IPASTGAAKAVGKVIPELN<br>GKLT  | 2234.31 | + |  | + |   |
|                                                           | 68 | IPASTGAAKAVGKVIPELN<br>GKLTG | 2291.32 | + |  | + |   |

|                                                            |     |                             |         |   |   |   |
|------------------------------------------------------------|-----|-----------------------------|---------|---|---|---|
|                                                            | 69  | IPELN                       | 584.32  | + | + |   |
|                                                            | 70  | IPELNGK                     | 769.43  | + | + |   |
|                                                            | 71  | IPELNGKLT                   | 983.56  |   | + |   |
|                                                            | 72  | NDHFVK                      | 759.36  |   | + |   |
|                                                            | 73  | NDHFVKL                     | 872.44  |   | + |   |
|                                                            | 74  | SSTFDAGAGIALNDHFVK          | 1848.91 | + | + |   |
|                                                            | 75  | TGAAKAVGKVIP                | 1110.68 | + | + |   |
|                                                            | 76  | VGKVIP*                     | 611.40  | + |   | + |
|                                                            | 77  | VGKVIPELN                   | 967.57  |   |   | + |
|                                                            | 78  | GVNGFGR                     | 804.43  |   |   | + |
|                                                            | 79  | GVNGFGRIGR                  | 1130.64 |   |   | + |
|                                                            | 80  | VTPNVS                      | 712.37  | + | + |   |
|                                                            | 81  | VTPNVSVD                    | 1025.54 |   |   | + |
|                                                            | 82  | VTPNVSVDLT                  | 1239.67 |   | + |   |
| G-protein coupled<br>receptor family C group<br>6 member A | 83  | AASPGHIM                    | 782.34  |   | + |   |
| GSTM1 protein                                              | 84  | LAVWGNK                     | 786.44  |   |   | + |
| Histone<br>acetyltransferase                               | 85  | PPQPQPAPPPP                 | 1218.65 | + |   |   |
| Importin subunit alpha                                     | 86  | QQQVQAVIDAGLIP              | 1478.88 |   | + |   |
| Matrix<br>metallopeptidase 19                              | 87  | LPTIPLVP                    | 848.54  | + | + |   |
| Meiosis arrest female<br>protein 1                         | 88  | KDVPSPL                     | 754.42  | + |   |   |
|                                                            | 89  | LPLK                        | 469.32  | + |   |   |
| MYBPC1 protein                                             | 90  | FKRSGEGQDDAGELDFSG<br>LLKRR | 2580.32 |   |   | + |
|                                                            | 91  | PDPP                        | 424.23  |   |   | + |
| Myoglobin                                                  | 92  | DMAAQYKVLGFHG               | 1435.69 | + |   |   |
|                                                            | 93  | GGILK                       | 486.32  |   |   | + |
|                                                            | 94  | TALGGIL                     | 643.39  |   |   | + |
|                                                            | 95  | VAGHGQEVL*                  | 908.47  |   |   | + |
|                                                            | 96  | VLGFHG                      | 628.34  |   |   | + |
| Myosin light chain 1/3                                     | 97  | AAPAPAPAPAPAPAPAPP<br>KEEK  | 2045.10 |   |   | + |
| Myosin, light chain 6B                                     | 98  | ELPSL                       | 557.30  |   |   | + |
|                                                            | 99  | IPVILEKPAK                  | 1106.71 |   |   | + |
|                                                            | 100 | PAVGPPPSR                   | 876.48  |   |   | + |
|                                                            | 101 | VDAEM                       | 605.23  |   |   | + |
|                                                            | 102 | VGPPPSR                     | 708.39  |   |   | + |
| Myozenin-1                                                 | 103 | NRTPIP                      | 697.38  |   | + |   |
|                                                            | 104 | NVDISIP                     | 757.39  |   | + |   |
|                                                            | 105 | YNVDISIPLD                  | 1147.58 |   | + |   |

|                                                          |     |                       |         |   |   |   |   |
|----------------------------------------------------------|-----|-----------------------|---------|---|---|---|---|
| Nuclear receptor binding factor 2                        | 106 | DIIPNLPP              | 974.48  |   |   | + |   |
| O(6)-methylguanine-induced apoptosis 2                   | 107 | PAANAYT               | 706.46  |   |   |   | + |
| Olfactory receptor                                       | 108 | LGNLGLIL*             | 811.48  |   |   |   | + |
|                                                          | 109 | LILLIWVD              | 983.56  |   | + |   |   |
| Paternally-expressed gene 3 protein                      | 110 | KAAGASSLSAPPAA        | 1197.71 |   | + |   |   |
| PDZ and LIM domain 5                                     | 111 | DWHHEVS               | 908.38  |   |   |   | + |
| Phosphodiesterase                                        | 112 | LLADPSLP*             | 824.46  |   |   | + |   |
| Phosphoglycerate kinase 1                                | 113 | VGVN                  | 387.21  |   |   |   | + |
|                                                          | 114 | AAVPSIK               | 684.42  |   |   |   | + |
|                                                          | 115 | ALESPER               | 800.41  |   |   |   | + |
|                                                          | 116 | SLSNKLTLDKLDVKGK      | 1800.04 |   |   |   | + |
| PIH1 domain-containing protein 1                         | 117 | VGENR                 | 573.30  |   |   |   | + |
| PIM2 protein (Fragment)                                  | 118 | PMTPTPLP              | 852.49  |   | + | + |   |
| Plastin-3 OS=Bos taurus GN=PLS3 PE=1 SV=1; Plastin-3     | 119 | SLAVVDL               | 715.39  |   | + |   |   |
| Probable cystatin-15                                     | 120 | PLLLGLLALGPH          | 1212.74 |   |   |   | + |
| Programmed cell death protein 2                          | 121 | PSEDPPSE              | 856.39  |   |   | + |   |
| Protein YIPF6                                            | 122 | EGEITIP               | 757.39  |   |   | + |   |
| Pyruvate kinase                                          | 123 | FTNTMRVVPVP           | 1259.67 | + | + | + |   |
|                                                          | 124 | NTMRVVPVP             | 1011.55 | + |   |   |   |
| RBM34 protein                                            | 125 | LQPVYVPVP*            | 1011.55 | + |   |   |   |
| Retinoic acid receptor RXR-gamma                         | 126 | GINLVAP               | 682.44  |   |   |   | + |
| RING finger protein 10                                   | 127 | ALSLSPLSR             | 942.53  |   | + |   |   |
| Ring finger protein 214                                  | 128 | VRNGAKLSSLPQIP*       | 1478.88 |   | + |   |   |
| Sodium channel protein                                   | 129 | PEVEVPVEQ             | 1154.52 |   | + |   |   |
| Solute carrier family 31 (Copper transporters), member 2 | 130 | PVSRSP                | 754.42  |   |   | + |   |
| Target of rapamycin complex subunit LST8                 | 131 | IPEPEVSIT             | 983.57  |   |   | + |   |
| Targeting protein for Xklp2                              | 132 | SGSLVQEP              | 815.44  |   |   | + |   |
| TOX high mobility group box family member 4              | 133 | ASMLPPP*              | 855.44  |   |   |   | + |
|                                                          | 134 | IVPP                  | 424.23  |   |   |   | + |
|                                                          | 135 | LVPP*                 | 424.23  |   |   |   | + |
| Transcription initiation factor IIB                      | 136 | PECGLVVG              | 772.36  | + |   |   |   |
| Troponin T fast skeletal muscle type                     | 137 | AQEEAPPPPAEVPEVHEE VH | 2190.03 |   |   | + |   |
|                                                          | 138 | EAPPPPAEVPEVHEEVH     | 1861.89 |   | + | + |   |
|                                                          | 139 | EEAPPPPAEVPEVHEEVH    | 1990.94 |   | + | + |   |

|                             |     |                     |         |   |   |   |
|-----------------------------|-----|---------------------|---------|---|---|---|
|                             | 140 | SDEEVEHVE           | 1113.45 |   |   | + |
|                             | 141 | APPPPAEVP*          | 873.46  |   | + |   |
|                             | 142 | APPPPAEVPEVHEE      | 1496.71 |   | + |   |
|                             | 143 | APPPPAEVPEVHEEVH    | 1732.84 |   | + | + |
|                             | 144 | APPPPAEVPEVHEEVHEVH | 2098.01 |   | + |   |
|                             | 145 | EVPEVHEEVH          | 1202.56 |   | + | + |
|                             | 146 | VPEVHEEVH           | 1073.52 |   | + | + |
| UBA domain<br>containing 1  | 147 | PTIDTPLP            | 852.49  | + | + | + |
| UPF0609 protein             | 148 | GAGLVVP             | 611.40  |   | + |   |
| C4orf27 homolog             |     |                     |         |   |   |   |
| Vasopressin V1b<br>receptor | 149 | MQVFVLH             | 872.44  |   |   | + |

+ indicates the presence of identified peptides from each treatment sample.

Small peptides which consists of an branched-chain amino acids at the N-terminus and hydrophobic amino acids at the C-terminus are indicated with an asterisk (\*).
